# Supplementary material for: Utilizing Li4Ti5O12 as multifunctional filler in composite solid electrolyte for all-solid-state lithium metal battery
Source: Royal Society of Chemistry journal article supplement (doi:10.1039/d4ta04591b), 2024-01-01
Supplement: d4ta04591b1.pdf [file d4ta04591b1.pdf]

## Electronic Supporting Information: ESI

### Utilizing $\text{Li}_4\text{Ti}_5\text{O}_{12}$ as Multifunctional Filler of Composite Solid

#### Electrolyte for All-Solid-State Lithium Metal Battery

Yubo Xu,<sup>a</sup> Xiaosong Xiong,<sup>a</sup> Jun Peng,<sup>b</sup> Qi Zhou,<sup>a</sup> Wenzhuo Wu,<sup>c</sup> Wanjie Gao,<sup>a</sup> Yi Peng,<sup>a</sup> Tao Wang,<sup>a\*</sup>  
Faxing Wang,<sup>a</sup> and Yuping Wu<sup>\*a,b,c</sup>

<sup>a</sup>Confucius Energy Storage Lab, School of Energy and Environment & Z Energy Storage Center, Southeast University, Nanjing 211189, China.

<sup>b</sup>School of Energy Science and Engineering, Nanjing Tech University, Nanjing 211816, China.

<sup>c</sup>R & D Center, DKJ New Energy Tech Co Ltd, Shaoxing 312365, China.

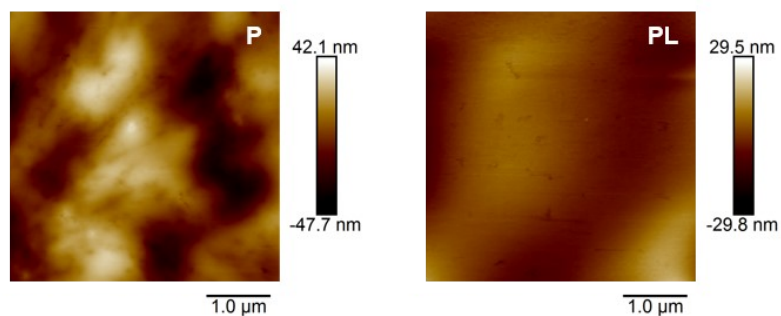

Fig. S1 AFM surface topographies of P and PL membrane.

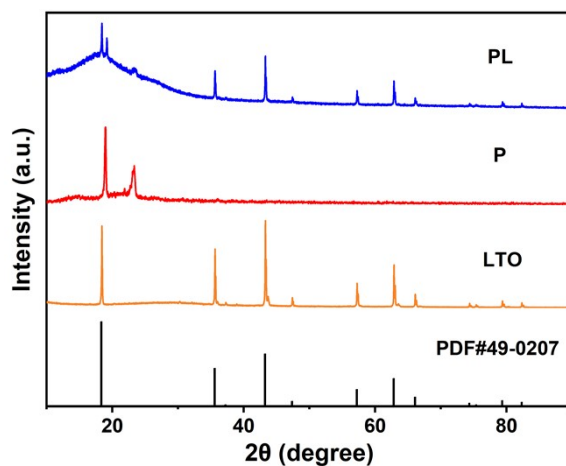

Fig. S2 XRD spectra of P and PL membrane.

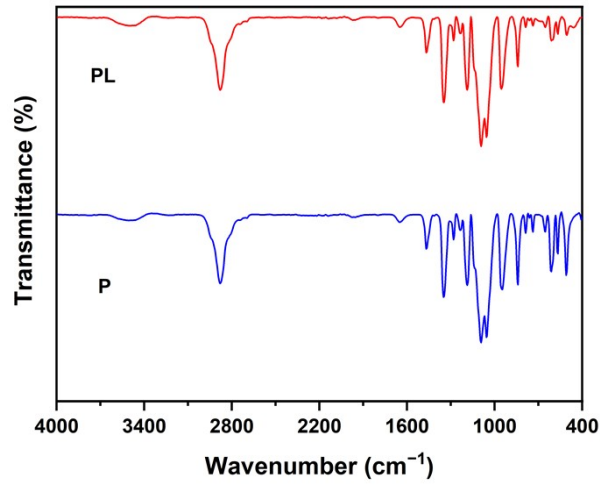

Fig. S3 FTIR spectra of P and PL membrane.

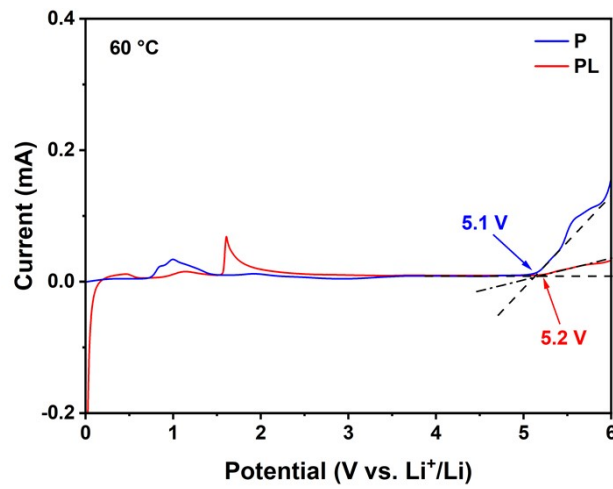

Fig. S4 LSV curve of P and PL membrane.

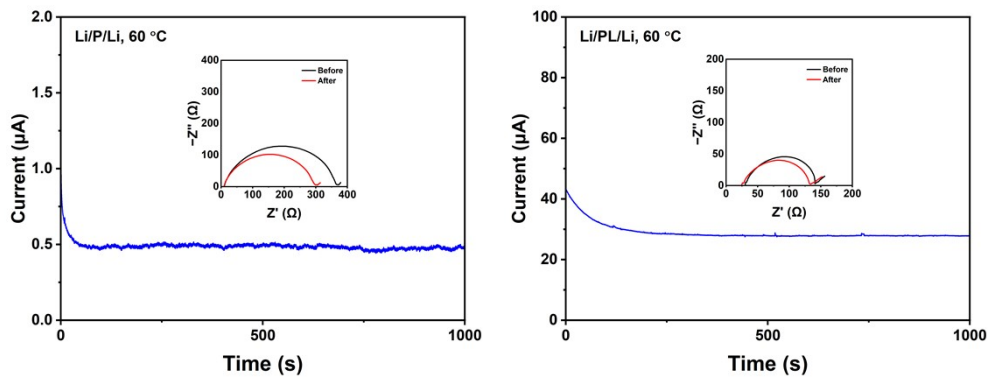

Fig. S5  $\text{Li}^+$  transference number of P and PL membrane.

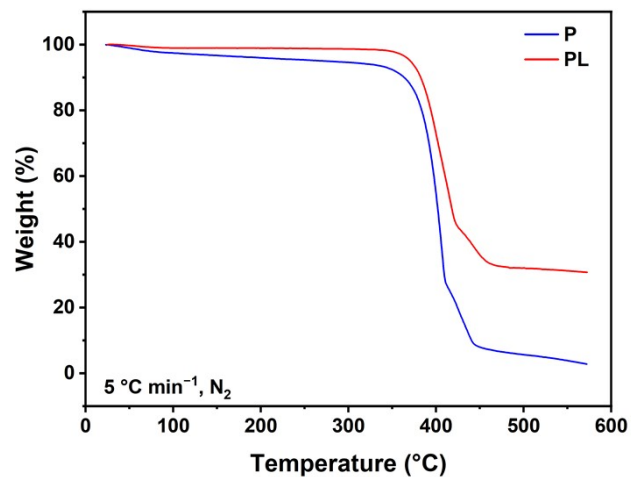

Fig. S6 TG curve of P and PL membrane.

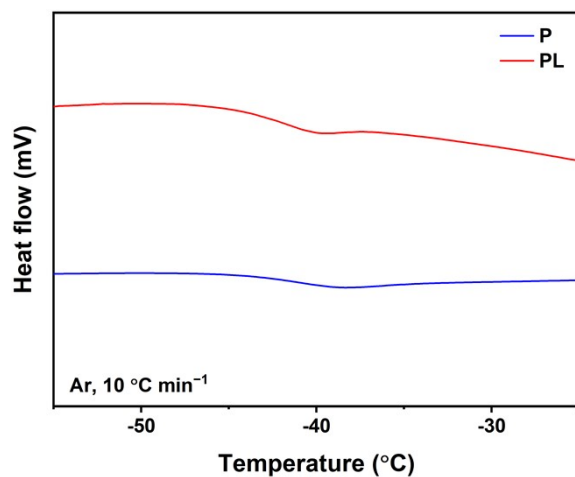

Fig.S7 DSC curve of P and PL membrane.

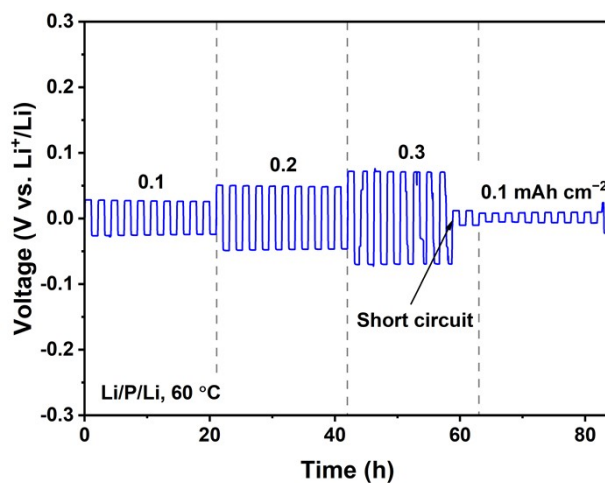

Fig. S8 Rate performance of Li/P/Li cells with stripping/plating of 1h.

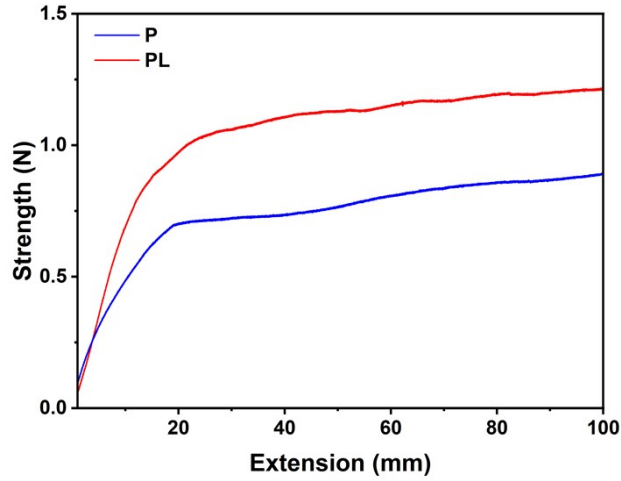

Fig. S9 Stretch Curve of P and PL membrane.

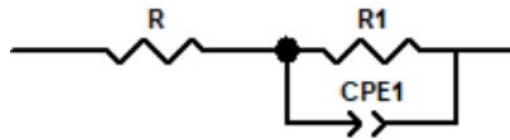

Fig. S10 Equivalent circuit of Li/Li symmetric cells.

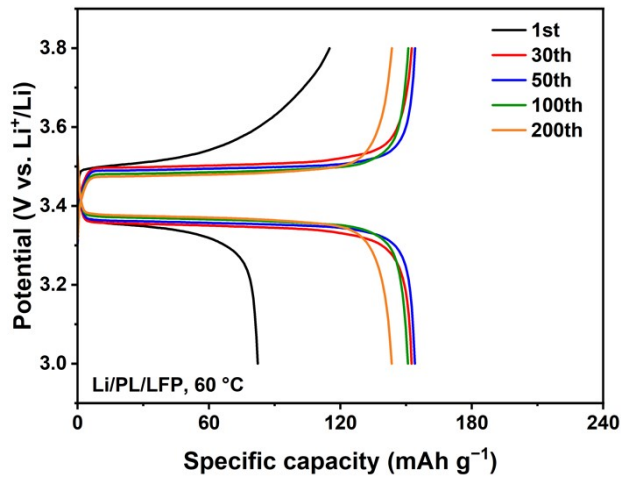

Fig. S11 Voltage-capacity curve of Li/PL/LFP cells at 0.5 C with different cycle

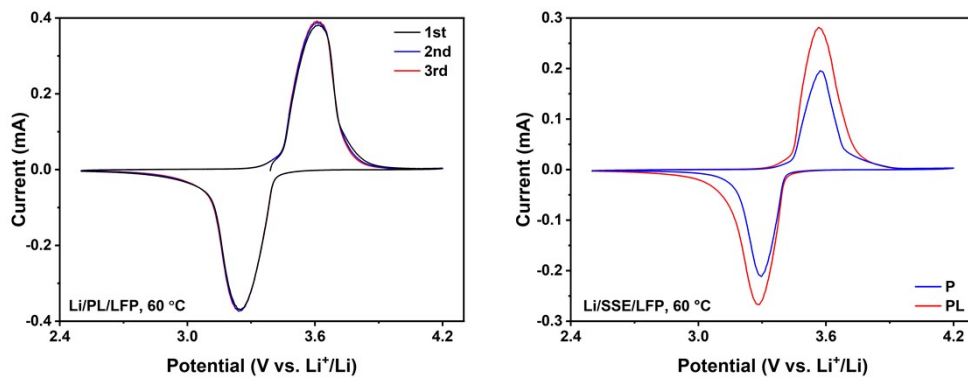

Fig. S12 CV curve of Li/LFP cells.

**Table S1** The particle size distribution of LTO.

| Item | Unit | Spec.   |
|------|------|---------|
| D10  | μm   | 0.2~0.6 |
| D50  | μm   | 0.8~1.6 |
| D90  | μm   | ≤10     |

**Table S2** Activation energy of PEO-x%LTO membrane.

| Sample      | Activation energy (kJ mol <sup>-1</sup> ) |          |
|-------------|-------------------------------------------|----------|
|             | 30~60 °C                                  | 60~80 °C |
| PEO-0%LTO   | 81.0                                      | 58.0     |
| PEO-20%LTO  | 118.8                                     | 87.7     |
| PEO-40%LTO  | 122.8                                     | 81.6     |
| PEO-60%LTO  | 89.5                                      | 34.0     |
| PEO-80%LTO  | 97.3                                      | 28.1     |
| PEO-100%LTO | 90.2                                      | 53.7     |

**Table S3** Assignment for FTIR bands of PL membrane.

| Wavenumber (cm <sup>-1</sup> ) | Assignment                                                                |
|--------------------------------|---------------------------------------------------------------------------|
| 3460                           | O-H stretching of PEO                                                     |
| 2880                           | C-H asymmetric stretching of PEO                                          |
| 1465                           | CH <sub>2</sub> scissoring of PEO                                         |
| 1350                           | CH <sub>2</sub> asymmetric bending of PEO                                 |
| 1281                           | CH <sub>2</sub> symmetric bending of PEO                                  |
| 1232                           | CH <sub>2</sub> symmetric twisting of PEO                                 |
| 1187                           | CF <sub>3</sub> asymmetric stretching of LiTFSI                           |
| 1093                           | C-O-C stretching of PEO                                                   |
| 1056                           | C-O-C stretching of PEO                                                   |
| 955                            | C-O stretching with some CH <sub>2</sub> asymmetric rocking of PEO        |
| 840                            | C-O stretching of PEO                                                     |
| 787                            | S-N-S asymmetric and symmetric stretching of LiTFSI                       |
| 738                            | S-N-S asymmetric and symmetric stretching of LiTFSI                       |
| 567                            | CF <sub>3</sub> asymmetric bending of LiTFSI                              |
| 520                            | CF <sub>3</sub> asymmetric bending of LiTFSI                              |
| 449                            | Ti-O bending vibration of Li <sub>4</sub> Ti <sub>5</sub> O <sub>12</sub> |

**Table S4** Electronic conductivity of P, PL and lithiated PL membrane.

| <b>Sample</b> | <b>Electronic conductivity (S cm<sup>-1</sup>)</b> |
|---------------|----------------------------------------------------|
| P             | 2.97E-10                                           |
| PL            | 4.12E-10                                           |
| Lithiated PL  | 4.76E-10                                           |
